# Supplementary material for: Nitrido-ruthenium(vi) and -osmium(vi) complexes of multianionic chelating (N, O) ligands. Reactions with nucleophiles, electrophiles and oxidizing agents
Source: Royal Society of Chemistry journal article supplement (doi:10.1039/b304920p), 2003-01-01
Supplement: b304920p.pdf [file b304920p.pdf]

## Supplementary Material

for

### **“Nitrido-ruthenium(VI) and Osmium(VI) Complexes of Multianionic Chelating (N, O) Ligands. Reactions with Nucleophiles, Electrophiles and Oxidizing Agents”**

*Ka-Lai Yip, Wing-Yiu Yu, Pui-Ming Chan, Nian-Yong Zhu and Chi-Ming Che\**

This material contains the electrospray ionization mass spectra for the reactions of "[Ru<sup>VI</sup>(N)(Cl)] (**1**) + morpholine", "[n-Bu<sub>4</sub>N][Os<sup>VI</sup>(N)(L<sup>2</sup>)] + PhI(OAc)<sub>2</sub>" and "[n-Bu<sub>4</sub>N][Os<sup>VI</sup>(N)(L<sup>3</sup>)] + PhI(OAc)<sub>2</sub>" (6 pages).

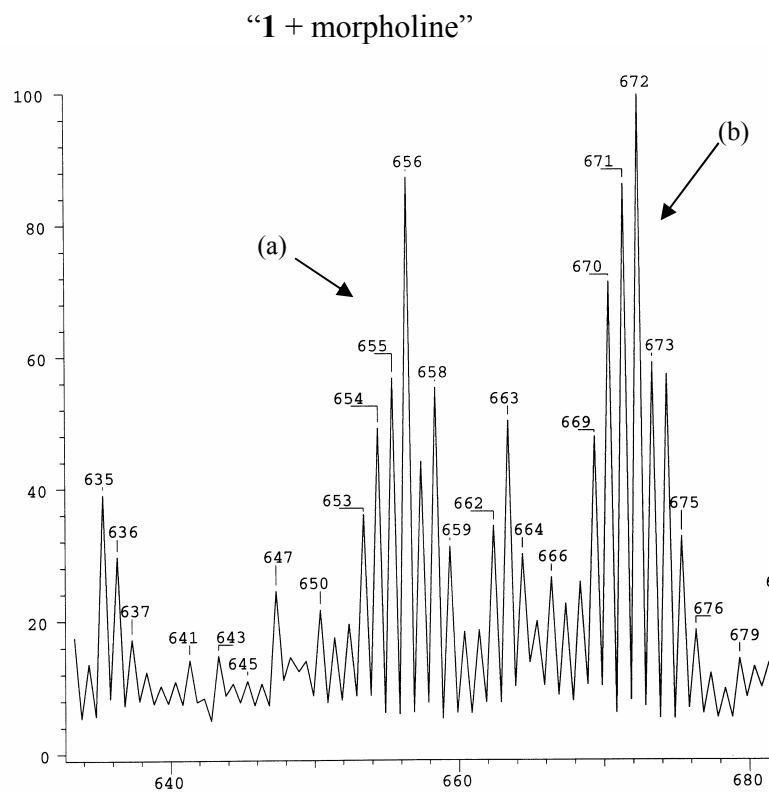

**Figure S1. ESI-MS spectrum of the reaction mixture of “1 + morpholine”. Experimental isotopic distribution patterns for (a)  $[(L^1)Ru(C_4H_9NO)]^+$  ( $m/z = 656$ ) and (b)  $[(L^1)Ru(N)(C_4H_9NO)]^+$  ( $m/z = 672$ )**

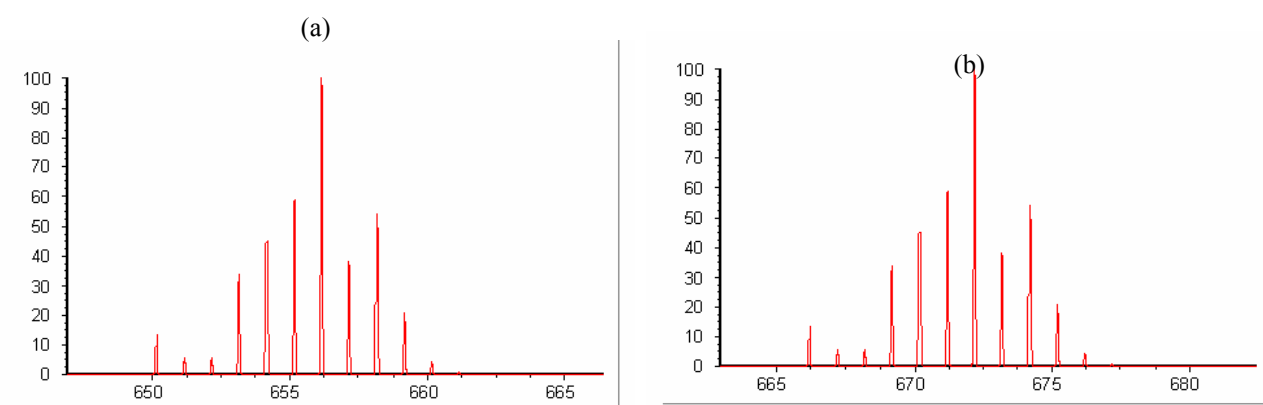

**Figure S2.** Calculated isotopic distribution patterns for (a)  $[(L^1)Ru(C_4H_9NO)]^+$  ( $m/z = 656$ ) and (b)  $[(L^1)Ru(N)(C_4H_9NO)]^+$  ( $m/z = 672$ )

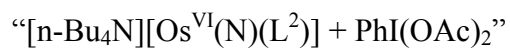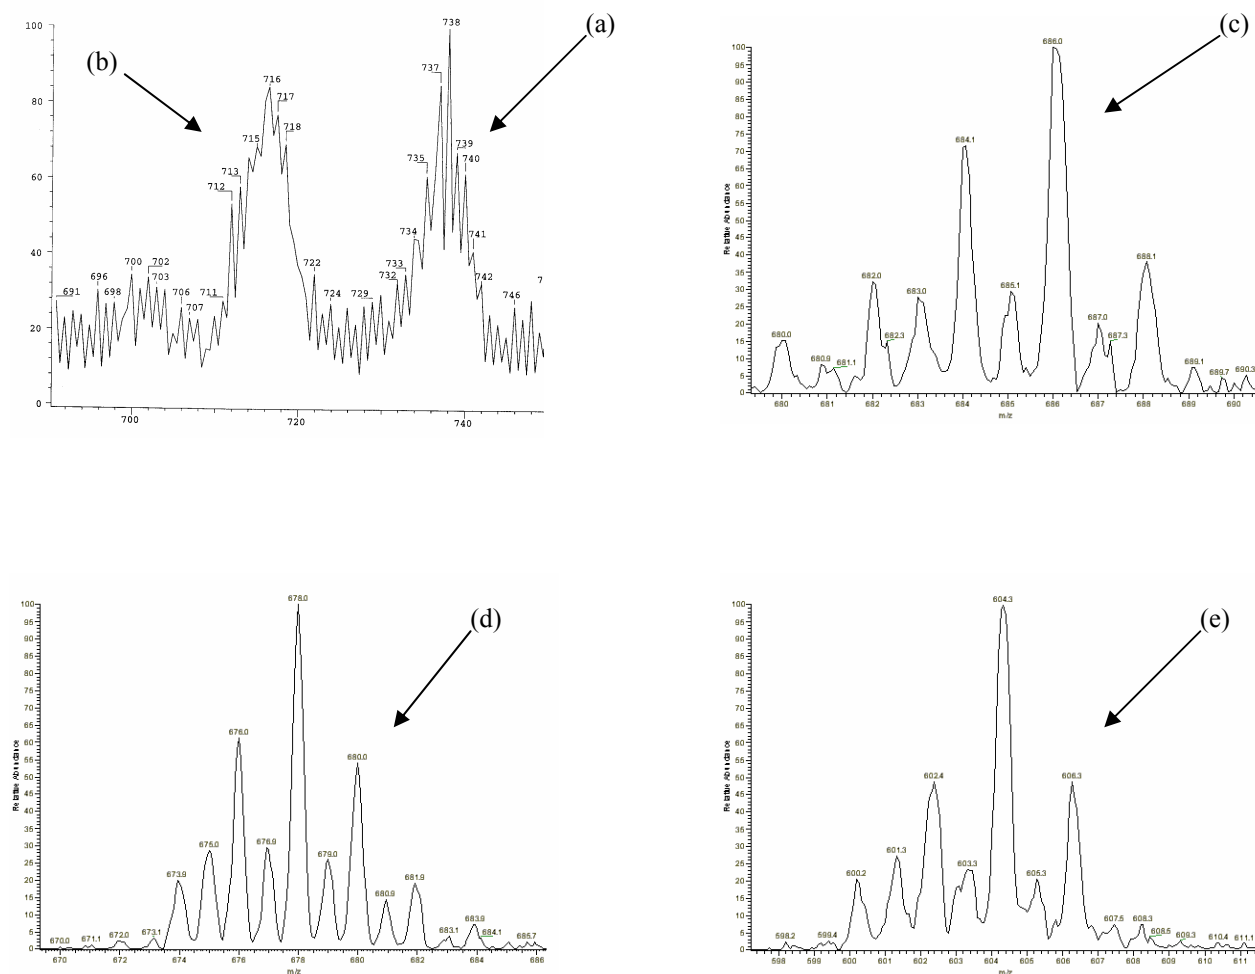

**Figure S3.** ESI-MS spectrum of the reaction mixture “[n-Bu<sub>4</sub>N][Os<sup>VI</sup>(N)(L<sup>2</sup>)] + PhI(OAc)<sub>2</sub>”. Experimental isotopic distribution patterns for (a) [(L<sup>2</sup>)Os<sup>IV</sup>(Hpz)(pz)]<sup>-</sup> (*m/z* = 738), (b) [(L<sup>2</sup>O<sub>2</sub>)Os<sup>VI</sup>(N)(Hpz)]<sup>-</sup> (*m/z* = 716), (c) [(L<sup>2</sup>)Os<sup>VI</sup>(N)(Hpz)]<sup>-</sup> (*m/z* = 686), (d) [(L<sup>2</sup>)Os<sup>VI</sup>(N)(OAcH)]<sup>-</sup> (*m/z* = 678) and (e) [(L<sup>2</sup>)Os<sup>III</sup>]<sup>-</sup> (*m/z* = 604)

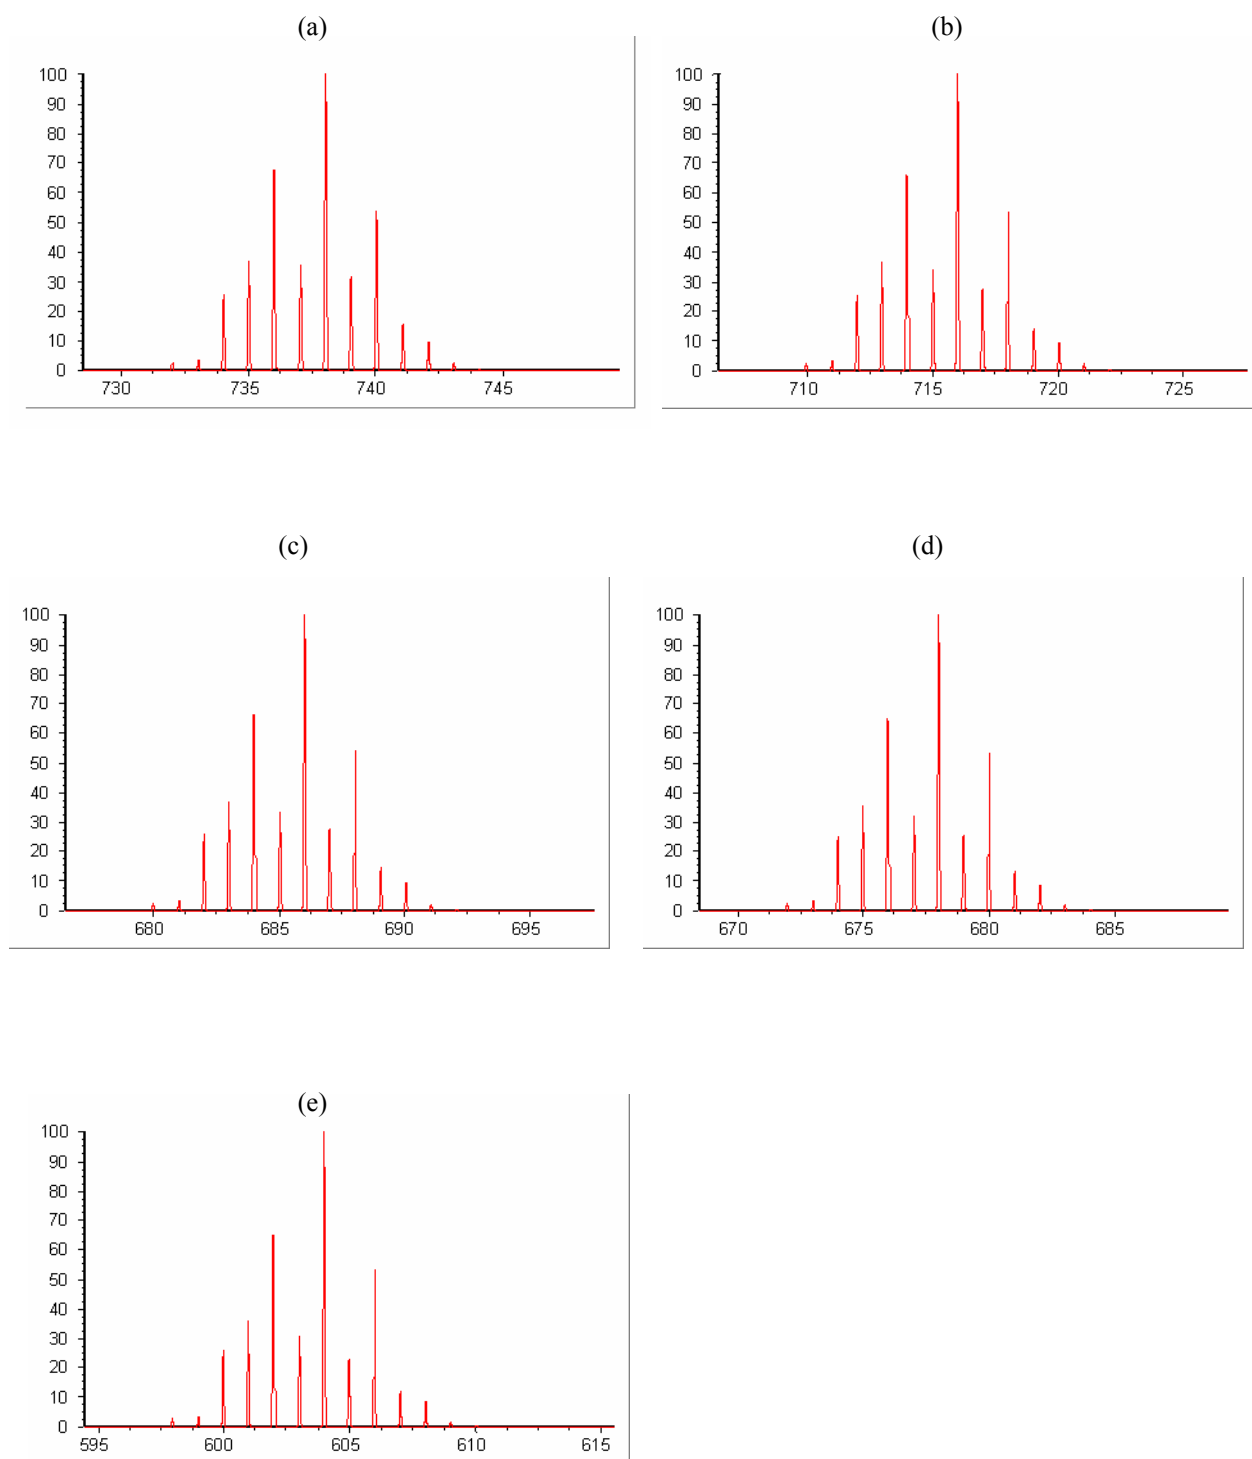

**Figure S4.** Calculated isotopic distribution patterns for (a)  $[(L^2)Os^{IV}(Hpz)(pz)]^-$  ( $m/z = 738$ ), (b)  $[(L^2O_2)Os^{VI}(N)(Hpz)]^-$  ( $m/z = 716$ ), (c)  $[(L^2)Os^{VI}(N)(Hpz)]^-$  ( $m/z = 686$ ), (d)  $[(L^2)Os^{VI}(N)(OAcH)]^-$  ( $m/z = 678$ ), and (e)  $[(L^2)Os^{III}]^-$  ( $m/z = 604$ )

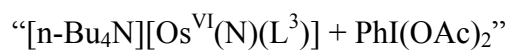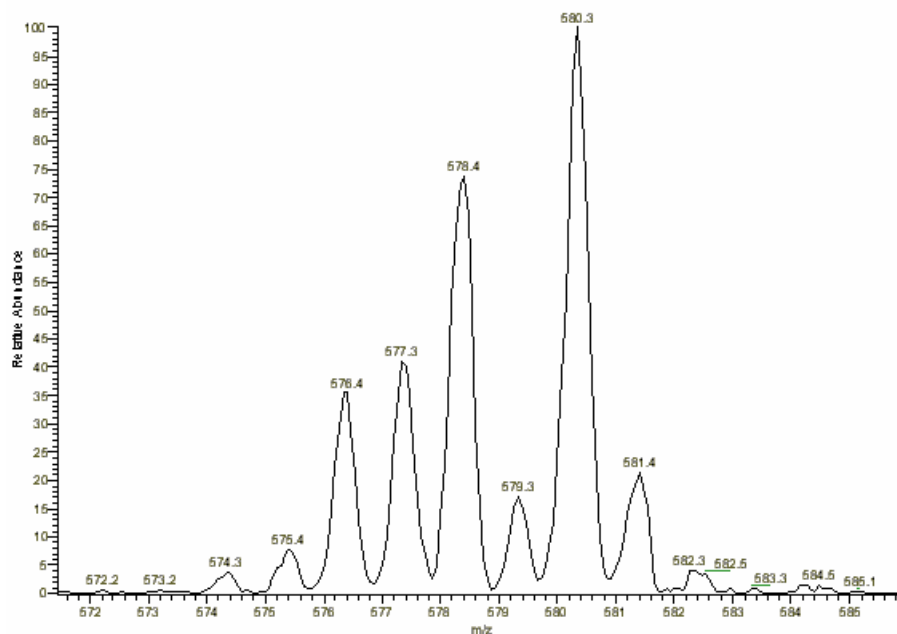

**Figure S5.** ESI-MS spectrum of the reaction mixture “[n-Bu<sub>4</sub>N][Os<sup>VI</sup>(N)(L<sup>3</sup>)] + PhI(OAc)<sub>2</sub>”. Experimental isotopic distribution patterns for [(L<sup>3</sup>O<sub>2</sub>)Os<sup>VI</sup>(N)]<sup>-</sup> (*m/z* = 580)

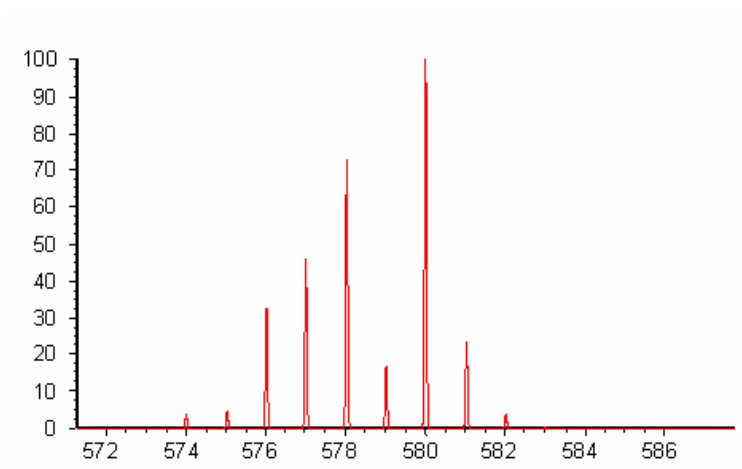

**Figure S6.** Calculated isotopic distribution pattern for [(L<sup>3</sup>O<sub>2</sub>)Os<sup>VI</sup>(N)]<sup>-</sup> (*m/z* = 580)
